# Supplementary material
Source: publisher figshare collection journal article supplement (https://acs.figshare.com/ndownloader/files/5054440)

## Supporting Information No.1

### Synthesis of (Z)-Alkene and (E)-Fluoroalkene Containing Diketopiperazine Mimetics Utilizing Organocopper-mediated Reduction-alkylation and Diastereoselectivity Examination Using DFT Calculations

Ayumu Niida<sup>†</sup>, Makiko Mizumoto<sup>†</sup>, Tetsuo Narumi<sup>†</sup>, Eriko Inokuchi<sup>†</sup>, Shinya Oishi<sup>†</sup>,  
Hiroaki Ohno<sup>†</sup>, Akira Otake<sup>†,‡</sup>, Kazuo Kitaura<sup>†</sup> and Nobutaka Fujii<sup>\*,†</sup>.

<sup>†</sup>Graduate School of Pharmaceutical Sciences, Kyoto University, Sakyo-ku, Kyoto 606-8501, Japan

<sup>‡</sup>Graduate School of Pharmaceutical Science, The University of Tokushima, Tokushima 770-8205, Japan

\*nfujii@pharm.kyoto-u.ac.jp

#### *Table of contents*

|                                                                                          |          |
|------------------------------------------------------------------------------------------|----------|
| Synthesis of alanine-derived substrate <b>41</b> .                                       | S2 ~ S5  |
| Structure determination of <b>42</b> .                                                   |          |
| Synthesis of acetate <b>14</b> .                                                         | S5 ~ S7  |
| <sup>1</sup> H NMR charts of <b>19</b> , <b>20</b> , <b>27</b> , <b>28</b> , <b>42</b> . | S8 ~ S17 |

## Synthesis of alanine-derived substrates **41** and structure determination of compound **42**.

**Scheme S1.**

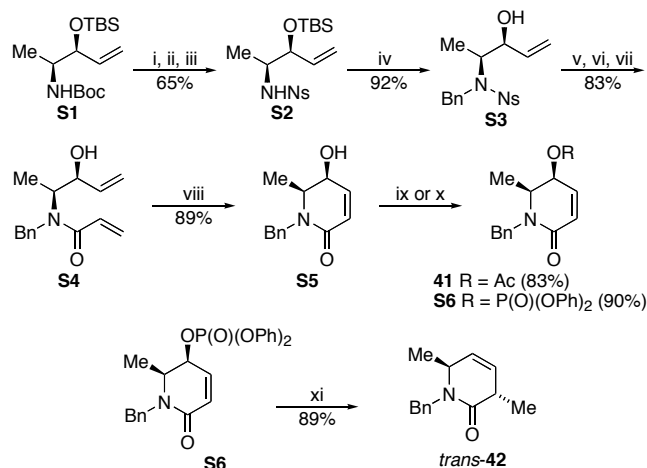

*Reagents:* (i) 4 M HCl in dioxane; (ii) Ns-Cl, 2,4,6-collidine, CHCl<sub>3</sub>; (iii) TBS-OTf, 2,6-lutidine, CH<sub>2</sub>Cl<sub>2</sub>; (iv) Bn-Br, K<sub>2</sub>CO<sub>3</sub>, DMF; (v) HSCH<sub>2</sub>CO<sub>2</sub>H, LiOH·H<sub>2</sub>O, DMF; (vi) CH<sub>2</sub>=CHCOCl, Et<sub>3</sub>N, CH<sub>2</sub>Cl<sub>2</sub>; (vii) TBAF, THF; (viii) Grubbs' catalyst second generation, CH<sub>2</sub>Cl<sub>2</sub>; (ix) Ac<sub>2</sub>O, pyridine, DMAP, CH<sub>2</sub>Cl<sub>2</sub>; (x) ClP(O)(OPh)<sub>2</sub>, pyridine, CH<sub>2</sub>Cl<sub>2</sub>; (xi) MeCu·LiI·LiBr, THF.

The acetate **41** was synthesized from the known allylic alcohol derivative **S1**<sup>1</sup> by use of a procedure identical with that described for the preparation of acetate **2** from the allylic alcohol derivative **7** (Scheme S1). The phosphate derivative **S6** was also synthesized by treatment of lactam **S5** with (PhO)<sub>2</sub>P(O)Cl in the presence of pyridine. Treatment of the phosphate **S6** with MeCu·LiI·LiBr in THF gave a S<sub>N</sub>2' derivative **42** as a single diastereomer, which was identical to the minor product of organocopper-mediated reduction/alkylation of acetate **41**. In our previous study<sup>2</sup>, it was confirmed that the S<sub>N</sub>2' reactions of phenylalanine-derived γ-phosphoryloxy-α,β-unsaturated-δ-lactam with organocopper reagent prepared from equimolar amount of copper salt and organometallic reagent proceed in an *anti*-S<sub>N</sub>2' manner without exception.<sup>2</sup> Organocopper-mediated *anti*-S<sub>N</sub>2' reactions of allylic phosphate derivatives have been well documented by other groups.<sup>3</sup> Therefore, the relative configuration of **42** obtained from phosphate **S6** was presumed to be 3,6-*trans*.

*References:* (1) Ibuka, T.; Habashita, H.; Otaka, A.; Fujii, N.; Oguchi, Y.; Uyehara, T.; Yamamoto, Y. *J. Org. Chem.* **1991**, 56, 4370. (2) Niida, A.; Oishi, S.; Sasaki, Y.; Mizumoto, M.; Tamamura, H.; Fujii, N.; Otaka, A. *Tetrahedron Lett.* **2005**, 46, 4183. (3) (a) Torneiro, M.; Fall, Y.; Castedo, L.; Mouriño, A. *J. Org. Chem.* **1997**, 62, 6344. (b) Belelie, J. L.; Chong, J. M. *J. Org. Chem.* **2001**, 66, 5552. (c) Calaza, M. I.; Hupe, E.; Knochel, P. *Org. Lett.* **2003**, 5, 1059. (d) Soorukram, D.; Knochel, P. *Org. Lett.* **2004**, 6, 2409.

**(3*S*,4*S*)-3-[(*tert*-Butyl)dimethylsiloxy]-4-[*N*-(2-nitrobenzenesulfonyl)amino]pent-1-en (**S2**).** By use of a procedure identical with that described for the preparation of the

sulfonamide **8** from **7**, the allylic alcohol derivative **S1** (4.0 g, 12.7 mmol) was converted into the title compound **S2** (3.28 g, 64.5% yield) as colorless crystals: mp 98–99 °C;  $[\alpha]_D^{23}$  –40.5 (c 0.87, CHCl<sub>3</sub>); <sup>1</sup>H NMR (400 MHz, CDCl<sub>3</sub>) δ 0.00 (s, 3H), 0.05 (s, 3H), 1.16 (d, *J* = 6.6 Hz, 3H), 3.50–3.63 (m, 1H), 4.00–4.08 (m, 1H), 4.86 (dt, *J* = 10.5, 1.5 Hz, 1H), 5.09 (dt, *J* = 17.3, 1.5 Hz, 1H), 5.58 (ddd, *J* = 17.1, 10.5, 5.9 Hz, 1H), 5.67 (d, *J* = 8.3 Hz, 1H), 7.69–7.75 (m, 2H), 7.81–7.88 (m, 1H), 8.07–8.14 (m, 1H); <sup>13</sup>C NMR (100 MHz, CDCl<sub>3</sub>) δ –5.0, –4.4, 18.0, 18.9, 25.7, 55.3, 75.8, 116.4, 125.2, 130.3, 132.7, 133.1, 135.4, 137.5, 147.8. Anal. Calcd for C<sub>17</sub>H<sub>28</sub>N<sub>2</sub>O<sub>5</sub>SSi: C, 50.97; H, 7.05; N, 6.99. Found: C, 50.69; H, 6.81; N, 6.97.

**(3S,4S)-4-[N-Benzyl-N-(2-nitrobenzenesulfonyl)]amino-3-[(tert-Butyl)dimethylsiloxy]pent-1-en (S3).** By use of a procedure identical with that described for the preparation of the *N*-methyl sulfonamide **9a** from **8**, the sulfonamide **S2** (2.54 g, 6.34 mmol) was converted into the title compound **S3** (2.86 g, 91.9% yield) as colorless oil:  $[\alpha]_D^{25}$  –134.2 (c 1.18, CHCl<sub>3</sub>); <sup>1</sup>H NMR (400 MHz, CDCl<sub>3</sub>) δ 0.00 (s, 3H), 0.03 (s, 3H), 0.85 (s, 9H), 1.25 (d, *J* = 6.6 Hz, 3H), 4.10–4.22 (m, 2H), 4.62 (d, *J* = 16.0 Hz, 1H), 4.67 (d, *J* = 16.3 Hz, 1H), 5.04 (dd, *J* = 10.5, 0.7 Hz, 1H), 5.17 (d, *J* = 17.1 Hz, 1H), 5.80 (ddd, *J* = 17.1, 10.2, 6.3 Hz, 1H), 7.04–7.13 (m, 3H), 7.16–7.27 (m, 3H), 7.41–7.50 (m, 3H); <sup>13</sup>C NMR (100 MHz, CDCl<sub>3</sub>) δ –4.8, –4.3, 16.4, 18.0, 25.8, 48.9, 58.7, 77.3, 116.9, 123.5, 127.1, 128.0, 128.2, 131.0, 131.2, 125.5, 135.0, 137.2, 138.3, 147.3; HRMS (FAB), *m/z* calcd for C<sub>24</sub>H<sub>35</sub>N<sub>2</sub>O<sub>5</sub>SSi (MH<sup>+</sup>) 491.2036, found 491.2037.

**(3S,4S)-4-(N-Acryloyl-N-benzyl)aminopent-1-en-3-ol (S4)** By use of a procedure identical with that described for the preparation of the acrylamide **10a** from **9a**, the sulfonamide **S3** (2.76 g, 5.62 mmol) was converted into the title compound **S4** (1.14 g, 82.6% yield) as colorless oil (rotamer mixture: ca. 1:0.1):  $[\alpha]_D^{25}$  –21.3 (c 0.69, CHCl<sub>3</sub>); <sup>1</sup>H NMR (400 MHz, CDCl<sub>3</sub>, main rotamer) δ 1.24 (d, *J* = 6.8 Hz, 3H), 4.00–4.16 (m, 2H), 4.52 (d, *J* = 17.6 Hz, 1H), 4.68 (d, *J* = 17.6 Hz, 1H), 5.15 (d, *J* = 10.5 Hz, 1H), 5.32 (d, *J* = 17.1 Hz, 1H), 5.67 (dd, *J* = 9.5, 2.7 Hz, 1H), 5.81 (ddd, *J* = 17.1, 10.3, 5.9 Hz, 1H), 6.36–6.52 (m, 2H), 7.16–7.40 (m, 5H); <sup>13</sup>C NMR (100 MHz, CDCl<sub>3</sub>) δ 14.7, 51.2, 58.7, 75.3, 115.9, 126.4, 127.4, 128.3, 128.6, 129.1, 137.0, 138.5, 168.6; HRMS (FAB), *m/z* calcd for C<sub>15</sub>H<sub>20</sub>NO<sub>2</sub> (MH<sup>+</sup>) 246.1494, found 246.1486.

**(5S,6S)-1-Benzyl-5,6-dihydro-5-hydroxy-6-methylpyridin-2-one (S5).** By use of a procedure identical with that described for the preparation of the lactam **11a** from **10a**, the acrylamide **S4** (1.05 g, 4.28 mmol) was converted into the title compound **S5** (832 mg, 89.5% yield) as colorless crystals: mp 141–142 °C;  $[\alpha]_D^{21}$  +21.8 (c 0.45, CHCl<sub>3</sub>); <sup>1</sup>H NMR (400 MHz, CDCl<sub>3</sub>) δ 1.17 (d, *J* = 6.8 Hz, 3H), 3.30–3.42 (m, 1H), 3.44–3.56 (m, 1H), 3.84 (d, *J* = 15.1 Hz, 1H), 4.59–4.68 (m, 1H), 5.24 (d, *J* = 15.1 Hz, 1H), 5.83 (dd, *J* = 10.0, 2.2 Hz, 1H), 6.35 (dt, *J* = 11.7, 1.7 Hz, 1H), 7.19–7.35 (m, 5H); <sup>13</sup>C NMR (100 MHz, CDCl<sub>3</sub>) δ 10.8, 47.2, 55.0, 67.1, 123.5, 127.4, 127.6, 128.6, 137.6, 142.6, 163.4. Anal. Calcd for C<sub>13</sub>H<sub>15</sub>NO<sub>2</sub>: C, 71.87; H, 6.96; N, 6.45. Found: C, 71.84; H, 6.91; N,

6.45.

**(5S,6S)-5-Acetoxy-1-Benzyl-5,6-dihydro-6-methylpyridin-2-one (41).** By use of a procedure identical with that described for the preparation of the acetate **2** from **11a**, the lactam **S5** (100 mg, 0.460 mmol) was converted into the title compound **41** (99.0 mg, 82.9% yield) as colorless oil:  $[\alpha]_D^{25} +46.4$  (c 1.19,  $\text{CHCl}_3$ );  $^1\text{H}$  NMR (400 MHz,  $\text{CDCl}_3$ )  $\delta$  1.15 (d,  $J = 6.6$  Hz, 3H), 2.08 (s, 3H), 3.66–3.79 (m, 1H), 4.02 (d,  $J = 15.1$  Hz, 1H), 5.23 (d,  $J = 15.1$  Hz, 1H), 5.59 (dt,  $J = 6.1, 2.4$  Hz, 1H), 6.03 (dd,  $J = 10.0, 2.2$  Hz, 1H), 6.32 (dt,  $J = 11.7, 1.7$  Hz, 1H), 7.24–7.39 (m, 5H);  $^{13}\text{C}$  NMR (100 MHz,  $\text{CDCl}_3$ )  $\delta$  12.0, 20.8, 47.3, 52.5, 69.1, 125.5, 127.5, 127.7, 128.7, 137.4, 137.6, 162.8, 169.9; HRMS (FAB),  $m/z$  calcd for  $\text{C}_{15}\text{H}_{18}\text{NO}_3$  ( $\text{MH}^+$ ) 260.1287, found 260.1292.

**(5S,6S)-1-Benzyl-5,6-dihydro-6-methyl-5-(diphenylphosphoryloxy)pyridin-2-one (S6).** To a solution of the alcohol **S5** (30.2 mg, 0.139 mmol) and pyridine (89.8  $\mu\text{L}$ , 1.11 mmol) in  $\text{CH}_2\text{Cl}_2$  (1 mL), was added dropwise diphenylphosphoryl chloride (116  $\mu\text{L}$ , 0.556 mmol) at 0 °C, and the mixture was stirred at 0 °C for 2 h.  $\text{H}_2\text{O}$  (1 mL) was added to the above mixture, and the whole was extracted with EtOAc. The extract was washed successively with saturated citric acid, brine, saturated  $\text{NaHCO}_3$ , and brine and dried over  $\text{MgSO}_4$ . Concentration under reduced pressure followed by flash chromatography over silica gel with *n*-hexane-EtOAc (1:1) gave the title compound **S6** (56.1 mg, 89.8% yield) as colorless oil:  $[\alpha]_D^{20} +27.8$  (c 0.84,  $\text{CHCl}_3$ );  $^1\text{H}$  NMR (400 MHz,  $\text{CDCl}_3$ )  $\delta$  1.48 (d,  $J = 6.6$  Hz, 3H), 3.61–3.72 (m, 1H), 3.96 (d,  $J = 15.1$  Hz, 1H), 5.21 (d,  $J = 15.1$  Hz, 1H), 5.38–5.45 (ddt,  $J = 8.3, 6.1, 2.2$  Hz, 1H), 6.00 (dd,  $J = 10.0, 1.5$  Hz, 1H), 6.35 (dt,  $J = 10.0, 2.0$  Hz, 1H), 7.06–7.37 (m, 15H);  $^{13}\text{C}$  NMR (100 MHz,  $\text{CDCl}_3$ )  $\delta$  11.6, 47.3, 53.6, 73.9, 119.8, 119.9, 125.6, 125.7, 127.6, 127.8, 128.8, 129.9, 130.0, 137.1, 137.4, 150.2, 162.5; HRMS (FAB),  $m/z$  calcd for  $\text{C}_{25}\text{H}_{25}\text{NO}_5\text{P}$  ( $\text{MH}^+$ ) 450.1470, found 450.1467.

**Organocopper-mediated *anti*- $\text{S}_{\text{N}}2'$  reaction of phosphate S6. Synthesis of (3S,6S)-1-Benzyl-3,6-dihydro-3,6-dimethylpyridine-2-one (*trans*-42).** To a suspension of CuI (33.5 mg, 0.176 mmol) in THF (0.75 mL), was added dropwise a solution of MeLi·LiBr in Et<sub>2</sub>O (1.5 M, 117  $\mu\text{L}$ , 0.176 mmol) at – 78 °C under argon, and the mixture was stirred for 10 min at 0 °C. To the above mixture, was added dropwise a solution of the phosphate **S6** (26.3 mg, 0.0585 mmol) in THF (0.75 mL) at – 78 °C, and the mixture was stirred for 20 min at – 78 °C. The reaction was quenched at – 78 °C by addition of a 1:1 saturated  $\text{NH}_4\text{Cl}$ -28% $\text{NH}_4\text{OH}$  solution (2 mL) with additional stirring at room temperature for 30 min. The mixture was extracted with Et<sub>2</sub>O and the extract was washed with  $\text{H}_2\text{O}$  and dried over  $\text{MgSO}_4$ . Concentration under reduced pressure followed by flash chromatography over silica gel with *n*-hexane-EtOAc (1:1) gave the title compound *trans*-**42** (11.2 mg, 88.9% yield) as colorless oil.

## Synthesis of acetate 14

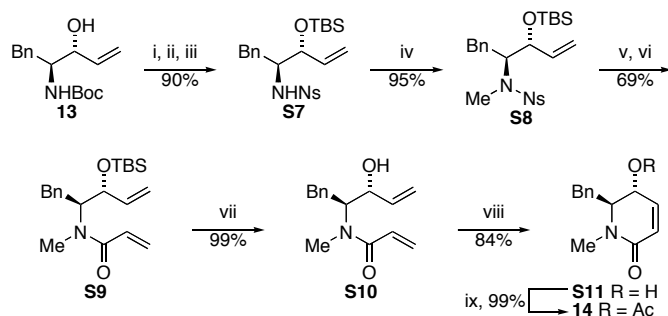

**Reagents:** (i) 4 M HCl in dioxane; (ii) Ns-Cl, 2,4,6-collidine,  $\text{CHCl}_3$ ; (iii) TBSOTf, 2,6-lutidine,  $\text{CH}_2\text{Cl}_2$ ; (iv) MeI,  $\text{K}_2\text{CO}_3$ , DMF; (v)  $\text{HSCH}_2\text{CH}_2\text{CO}_2\text{H}$ , LiOH, DMF; (vi)  $\text{CH}_2=\text{CHCOCl}$ ,  $\text{Et}_3\text{N}$ ,  $\text{CH}_2\text{Cl}_2$ ; (vii) TBAF, THF; (viii) Grubbs' catalyst second generation; (ix)  $\text{Ac}_2\text{O}$ , pyridine, DMAP,  $\text{CHCl}_3$ .

By use of a procedure identical with that described for the preparation of the acetate **2** from the allylic alcohol **7**, the acetate **14** was synthesized from the allylic alcohol **13** as shown in the above scheme.

**(3R,4S)-3-[(*tert*-Butyl)dimethylsiloxy]-4-[N-(2-nitrobenzenesulfonyl)amino]-5-phenylpent-1-en (S7).** By use of a procedure identical with that described for the preparation of **8** from **7**, the allylic alcohol **13** (1.70 g, 6.13 mmol) was converted into the title compound **S7** (2.64 g, 90.4% yield) as colorless oil:  $[\alpha]_{\text{D}}^{28} +110.0$  (c 0.41,  $\text{CHCl}_3$ );  $^1\text{H}$  NMR (400 MHz,  $\text{CDCl}_3$ )  $\delta$  0.00 (s, 3H), 0.08 (s, 3H), 0.89 (s, 9H), 2.67 (dd,  $J = 14.4, 10.0$  Hz, 1H), 2.89 (dd,  $J = 14.4, 4.8$  Hz, 1H), 3.66–3.80 (m, 1H), 4.40–4.48 (m, 1H), 5.28 (dt,  $J = 10.4, 1.6$  Hz, 1H), 5.37 (dt,  $J = 16.8, 1.6$  Hz, 1H), 5.50 (d,  $J = 8.0$  Hz, 1H), 5.91 (ddd,  $J = 17.2, 10.8, 5.2$  Hz, 1H), 6.88–7.00 (m, 5H), 7.44–7.80 (m, 4H);  $^{13}\text{C}$  NMR (100 MHz,  $\text{CDCl}_3$ )  $\delta$  -4.9, -4.5, 18.2, 25.8, 35.6, 62.3, 76.0, 117.2, 125.4, 126.4, 128.0, 128.1, 129.0, 129.8, 132.4, 132.9, 135.0, 137.2, 137.6, 146.9; HRMS (FAB),  $m/z$  calcd for  $\text{C}_{23}\text{H}_{33}\text{N}_2\text{O}_5\text{SSi}$  ( $\text{MH}^+$ ) 477.1879, found 477.1885.

**(3R,4S)-3-[(*tert*-Butyl)dimethylsiloxy]-4-[N-methyl-N-(2-nitrobenzenesulfonyl)amino]-5-phenylpent-1-en (S8).** By use of a procedure identical with that described for the preparation of **9a** from **8**, the sulfonamide **S7** (600 mg, 1.25 mmol) was converted into the title compound **S8** (585 mg, 95.4% yield) as colorless crystals: mp 95–97 °C;  $[\alpha]_{\text{D}}^{29} +22.1$  (c 1.77,  $\text{CHCl}_3$ );  $^1\text{H}$  NMR (400 MHz,  $\text{CDCl}_3$ )  $\delta$  0.04 (s, 3H), 0.10 (s, 3H), 0.94 (s, 9H), 2.80 (dd,  $J = 14.6, 10.7$  Hz, 1H), 3.05 (s, 3H), 3.08 (dd,  $J = 14.8, 3.6$  Hz, 1H), 4.13 (dt,  $J = 10.9, 4.0$  Hz, 1H), 4.44 (m, 1H), 5.19 (dd,  $J = 10.5, 0.9$  Hz, 1H), 5.29 (dd,  $J = 17.1, 1.2$  Hz, 1H), 5.88 (ddd,  $J = 17.1, 10.2, 6.8$  Hz, 1H), 6.97–7.12 (m, 5H), 7.20–7.35 (m, 2H), 7.37–7.52 (m, 2H);  $^{13}\text{C}$  NMR (100 MHz,  $\text{CDCl}_3$ )  $\delta$  -4.9, -3.8, 18.0, 25.9, 30.8, 32.3, 64.8, 77.8, 116.8, 123.6, 128.2, 129.0, 130.1, 131.3, 132.5, 133.4, 138.2, 138.9, 147.8. Anal. Calcd for  $\text{C}_{24}\text{H}_{34}\text{N}_2\text{O}_5\text{SSi}$ : C, 58.75; H, 6.98; N, 5.71. Found: C, 58.57; H, 7.13; N, 5.66.

**(3R,4S)-4-(N-Acryloyl-N-methylamino)-3-[(*tert*-butyl)dimethylsiloxy]-5-phenylpent-1-en (S9).** By use of a procedure identical with that described for the

preparation of *O*-TBS-**10a** from **9a**, the sulfonamide **S8** (510 mg, 1.03 mmol) was converted into the title compound **S9** (256 mg, 90.4% yield) as colorless oil (rotamer mixture):  $[\alpha]_{\text{D}}^{21} -59.7$  (c 1.36,  $\text{CHCl}_3$ );  $^1\text{H}$  NMR (400 MHz,  $\text{CDCl}_3$ )  $\delta$  -0.13–0.02 (m, 6H), 0.75–0.89 (m, 9H), 2.52–3.15 (m, 5H), 3.70–4.50 (m, 2H), 4.96–6.26 (m, 6H), 6.90–7.20 (m, 5H);  $^{13}\text{C}$  NMR (100 MHz,  $\text{CDCl}_3$ )  $\delta$  -4.8, -4.0, -3.9, -3.6, 18.0, 18.1, 25.6, 25.8, 28.5, 32.7, 34.5, 64.8, 75.4, 115.9, 117.2, 126.0, 126.5, 127.1, 128.2, 128.4, 128.5, 128.6, 128.8, 129.0, 138.1, 138.9, 139.3, 167.1, 168.2; HRMS (FAB),  $m/z$  calcd for  $\text{C}_{21}\text{H}_{34}\text{NO}_2\text{Si}$  ( $\text{MH}^+$ ) 360.2359, found 360.2365.

**(3R,4S)-4-(N-Acryloyl-N-methylamino)-5-phenylpent-1-en-3-ol (S10).** By use of a procedure identical with that described for the preparation of **10a** from *O*-TBS-**10a**, the acrylamide **S9** (103 mg, 0.286 mmol) was converted into the title compound **S10** (69.9 mg, 99.6% yield) as colorless oil (rotamer mixture):  $[\alpha]_{\text{D}}^{29} -100.8$  (c 1.92,  $\text{CHCl}_3$ );  $^1\text{H}$  NMR (600 MHz,  $\text{CDCl}_3$ )  $\delta$  2.73 (s, 3H), 2.81 (dd,  $J = 14.1, 10.9$  Hz, 0.6H), 2.90 (s, 1.8H), 3.02 (dd,  $J = 14.5, 4.3$  Hz, 1H), 3.18 (dd,  $J = 14.5, 11.5$  Hz, 1H), 3.24 (dd,  $J = 14.1, 3.2$  Hz, 0.6H), 3.81–3.86 (m, 0.2H), 3.98 (ddd,  $J = 10.8, 8.0, 3.0$  Hz, 0.4H), 4.15 (m, 1H), 4.24 (t,  $J = 7.4$  Hz, 0.5H), 4.48 (m, 1H), 5.21 (d,  $J = 10.4$  Hz, 0.3H), 5.23 (dt,  $J = 11.8, 1.1$  Hz, 1H), 5.34 (m, 1H), 5.40 (dt,  $J = 17.1, 1.3$  Hz, 1H), 5.66 (dd,  $J = 10.4, 1.9$  Hz, 1H), 5.79–5.88 (m, 0.75H), 5.96 (ddd,  $J = 16.5, 10.4, 5.8$  Hz, 1H), 6.04 (dd,  $J = 16.9, 10.7$  Hz, 0.4H), 6.26 (dd,  $J = 16.7, 1.9$  Hz, 1H), 6.35 (dd,  $J = 16.7, 10.4$  Hz, 0.4H), 6.36 (dd,  $J = 16.8, 10.4$  Hz, 1H), 7.10–7.30 (m, 8H);  $^{13}\text{C}$  NMR (100 MHz,  $\text{CDCl}_3$ )  $\delta$  27.9, 28.5, 29.6, 31.7, 34.4, 36.1, 63.7, 65.8, 74.0, 74.2, 75.0, 116.3, 117.4, 126.2, 126.3, 126.5, 128.0, 128.2, 128.4, 128.5, 128.7, 128.8, 128.9, 137.6, 137.9, 138.2, 138.5, 168.2, 168.3; HRMS (FAB),  $m/z$  calcd for  $\text{C}_{15}\text{H}_{20}\text{NO}_2$  ( $\text{MH}^+$ ) 246.1494, found 246.1495.

**(5R,6S)-6-Benzyl-5,6-dihydro-1-methyl-5-hydroxypyridin-2-one (S11).** By use of a procedure identical with that described for the preparation of **11a** from **10a**, the acrylamide **S10** (31 mg, 0.126 mmol) was converted into the title compound **S11** (23.1 mg, 84.3% yield) as colorless crystals: mp 129–131 °C;  $[\alpha]_{\text{D}}^{24} -301.5$  (c 0.47,  $\text{CHCl}_3$ );  $^1\text{H}$  NMR (270 MHz,  $\text{CDCl}_3$ )  $\delta$  2.63 (dd,  $J = 13.5, 8.6$  Hz, 1H), 2.88 (s, 3H), 2.91 (dd,  $J = 13.5, 8.7$  Hz, 1H), 3.65–3.78 (m, 1H), 3.92–4.00 (m, 1H), 5.99 (d,  $J = 9.5$  Hz, 1H), 6.57 (ddd,  $J = 9.5, 5.6, 1.4$  Hz, 1H), 7.06–7.36 (m, 5H);  $^{13}\text{C}$  NMR (100 MHz,  $\text{CDCl}_3$ )  $\delta$  34.4, 37.6, 63.6, 67.4, 126.8, 126.9, 128.8, 129.1, 136.9, 137.0, 162.5. Anal. Calcd for  $\text{C}_{13}\text{H}_{15}\text{NO}_2$ : C, 71.87; H, 6.96; N, 6.45. Found: C, 71.71; H, 6.97; N, 6.26.

**(5R,6S)-5-Acetoxy-6-benzyl-5,6-dihydro-1-methylpyridin-2-one (14).** By use of a procedure identical with that described for the preparation of **2** from **11a**, the lactam **S11** (366 mg, 1.68 mmol) was converted into the title compound **14** (435 mg, 99.9% yield) as colorless crystals: mp 71–73 °C;  $[\alpha]_{\text{D}}^{26} -353.8$  (c 0.96,  $\text{CHCl}_3$ );  $^1\text{H}$  NMR (600 MHz,  $\text{CDCl}_3$ )  $\delta$  2.00 (s, 3H), 2.76 (dd,  $J = 13.8, 8.3$  Hz, 1H), 2.90 (s, 3H), 2.97 (dd,  $J = 13.8, 6.3$  Hz, 1H), 3.69–3.74 (m, 1H), 5.04 (dd,  $J = 5.7, 0.9$  Hz, 1H), 6.14 (d,  $J = 9.6$  Hz, 1H), 6.51 (ddd,  $J = 9.6, 5.7, 1.2$  Hz, 1H), 7.13–7.17 (m, 2H), 7.24–7.35 (m, 3H);  $^{13}\text{C}$  NMR (100 MHz,  $\text{CDCl}_3$ )  $\delta$  20.9, 34.2, 37.5, 64.1, 65.7, 127.2, 128.9, 129.1, 129.7, 132.3,

136.4, 161.9, 170.1. Anal. Calcd for  $C_{15}H_{17}NO_3$ : C, 69.48; H, 6.61; N, 5.40. Found: C, 69.42; H, 6.68; N, 5.28.

# NMR charts of representative compounds

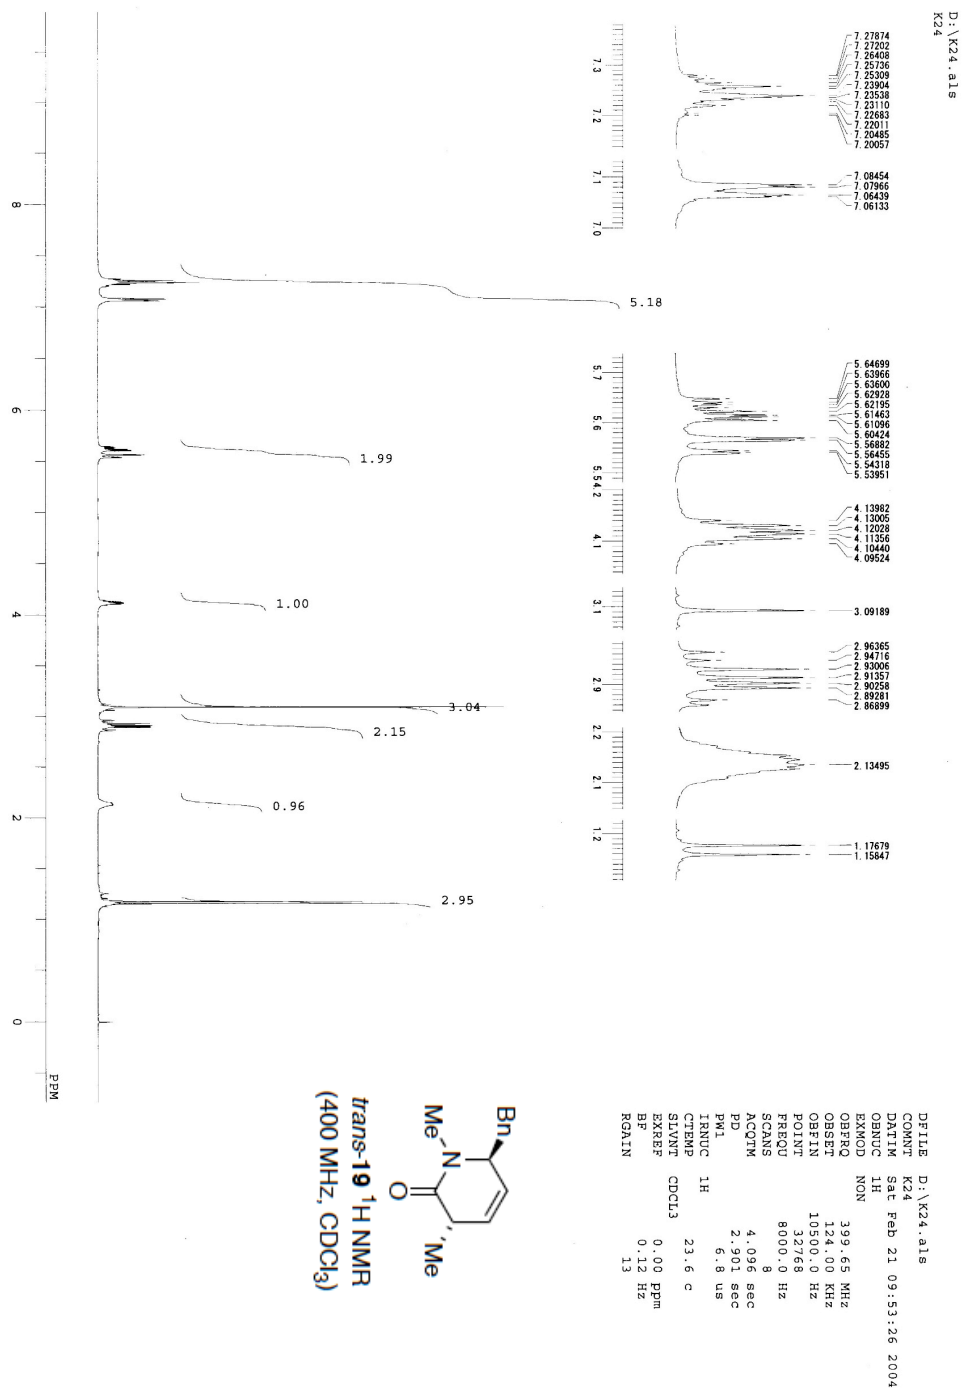



C:\Documents and Settings\Administrator\rf\N/g/b/v\Nida\K51-2.als  
K51-2

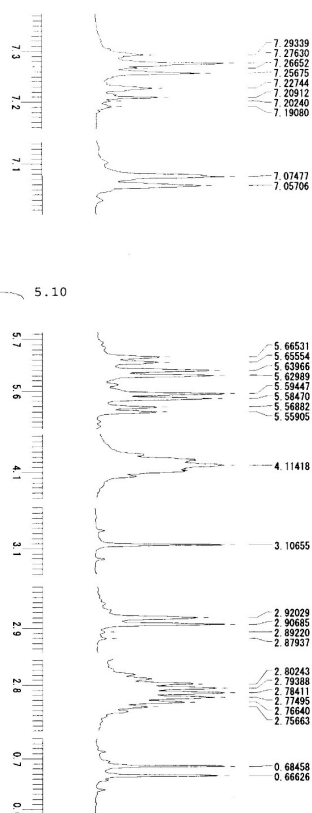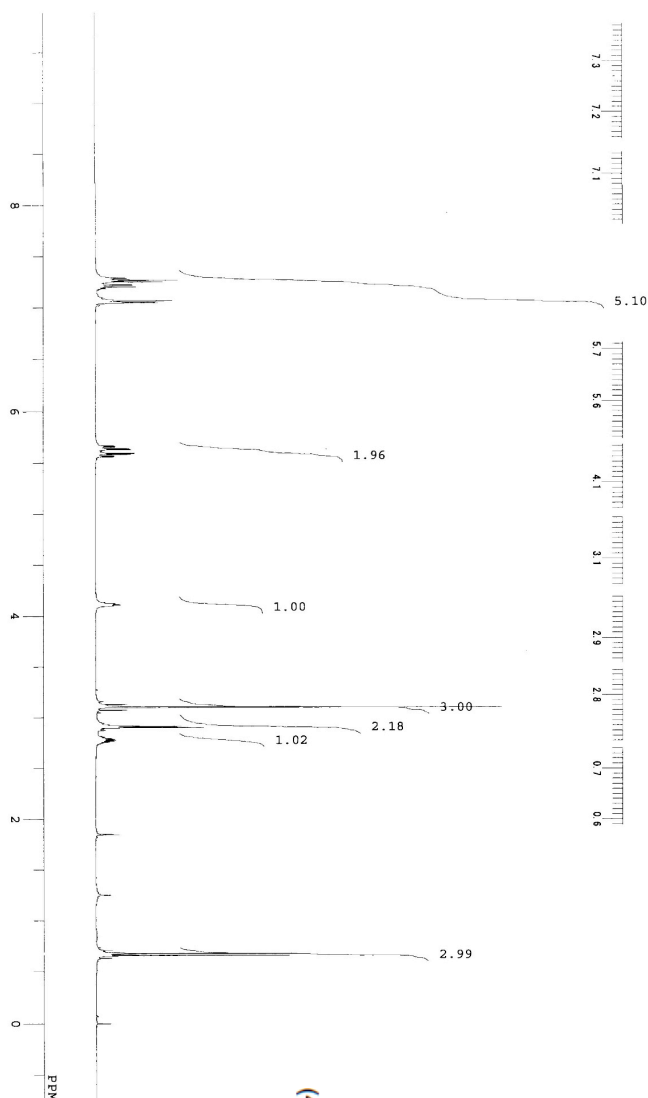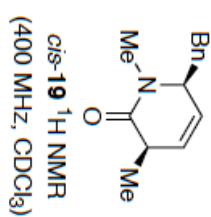

DPFIE C:\Documents and Settings\Admini  
COMNT K51-2  
DATIM Thu Mar 18 11:30:57 2004  
ORNUC 1H  
EXMOD NON  
ORPRO 399.65 MHz  
ORSET 124.00 KHz  
ORFIN 10500.0 Hz  
POINT 32768  
PREOU 8000.0 Hz  
SCANS 8  
ACQTM 4.096 sec  
PD 2.901 sec  
PWL 6.8 us  
IRNUC 1H  
CTEMP 22.3 C  
SLVNT CDCl<sub>3</sub>  
EXREF 0.00 ppm  
B<sub>F</sub> 0.12 Hz  
RGAIN 14

C:\Documents and Settings\Administrator\My Documents\K36-2.als

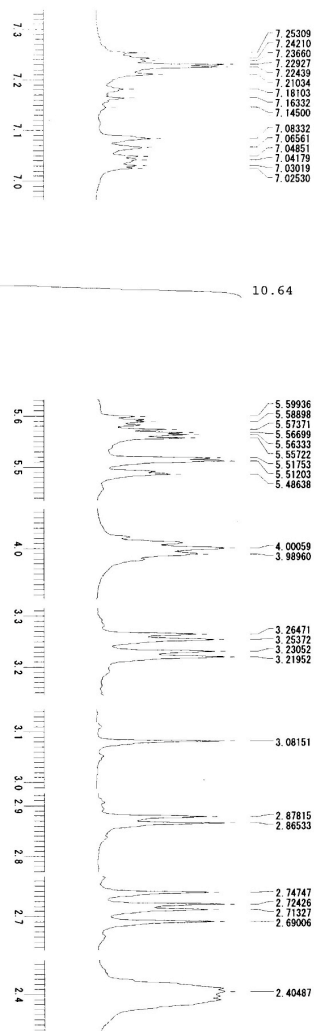

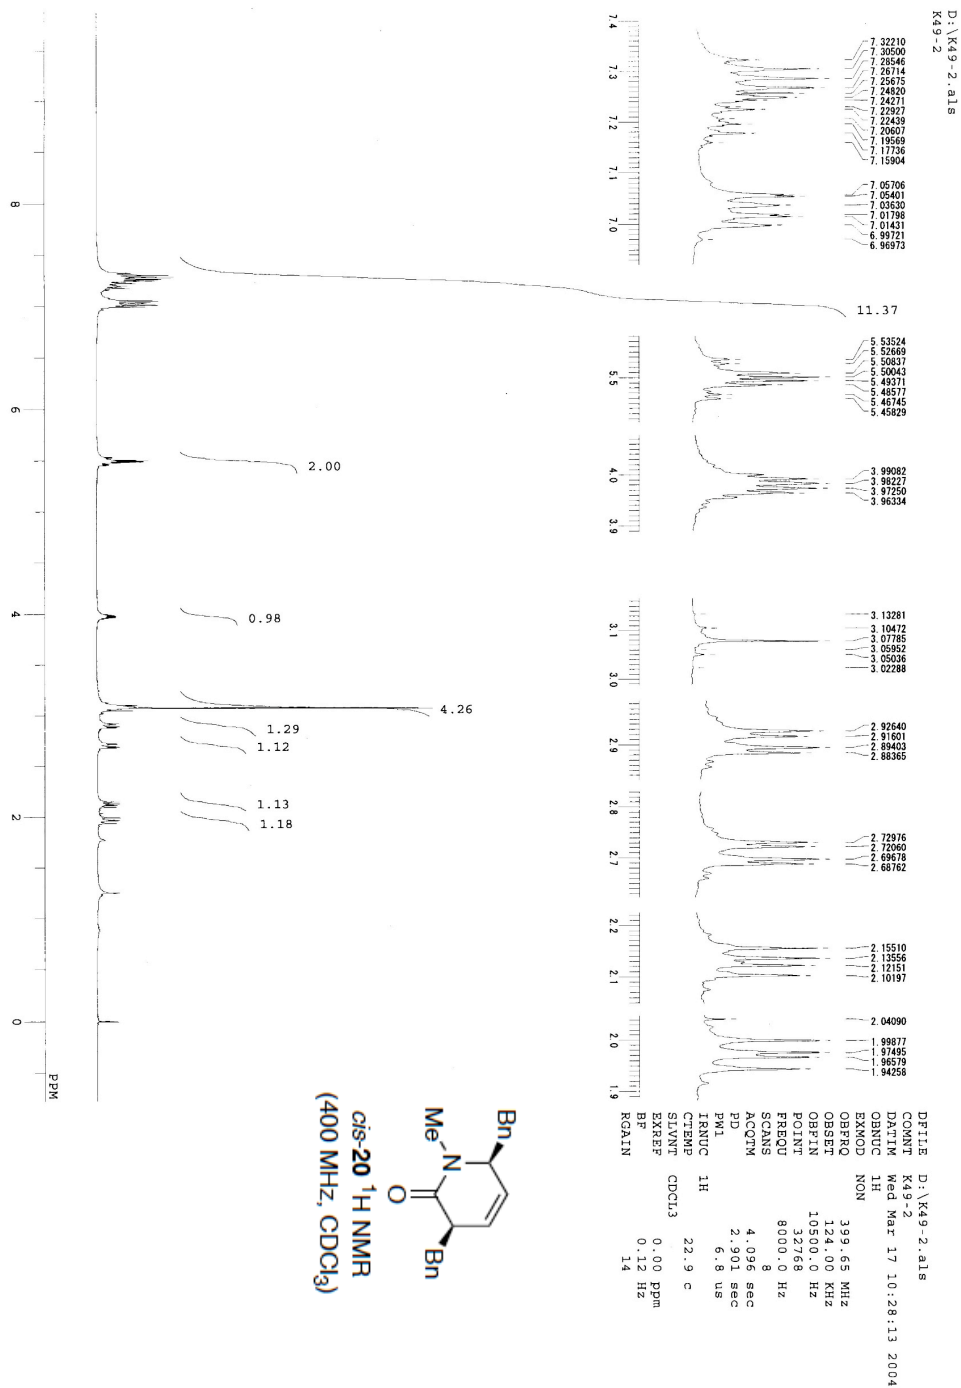

D:\I-5\154-1-1NON\_E8\_FT.als  
154-1

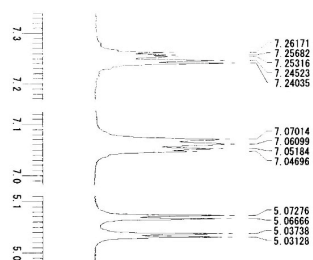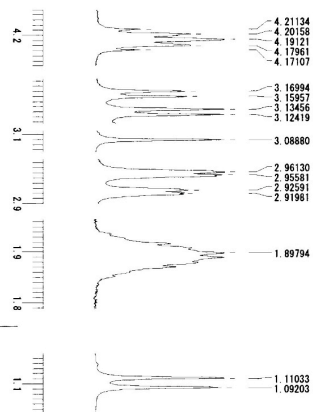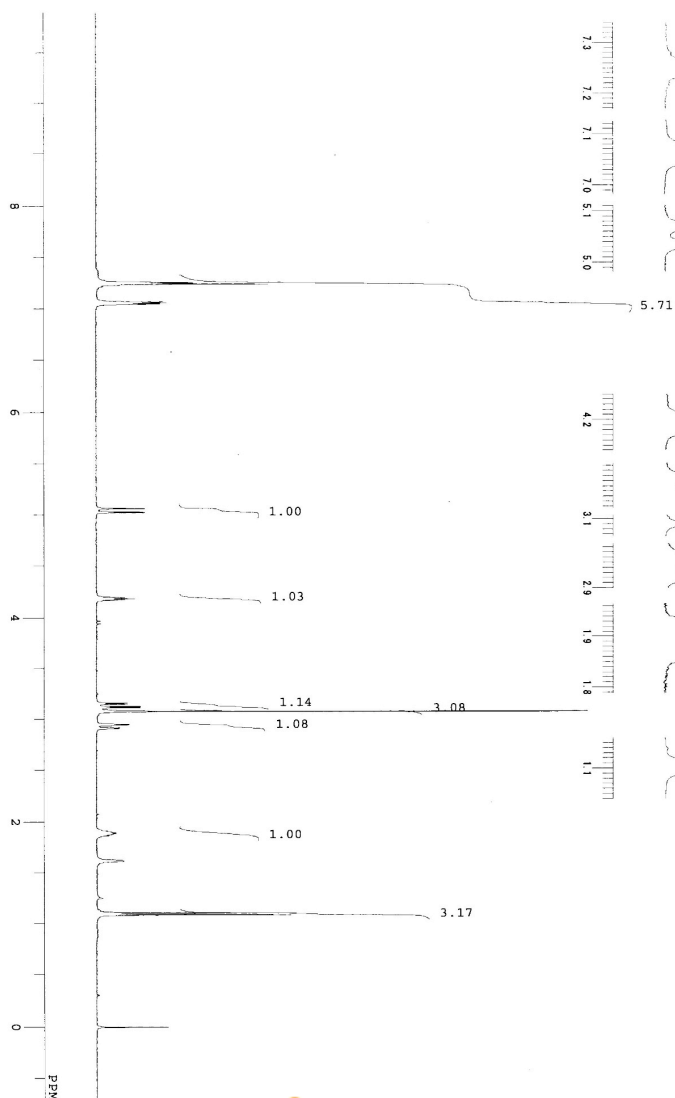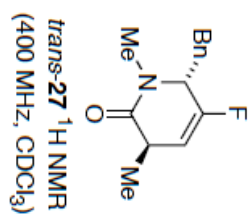

D:\I-5\154-1-1NON\_E8\_FT.als  
COMNT 154-1  
DATIM Tue Dec 14 22:09:58 2004  
OBNUC 1H  
EXMOD NON  
OBFQ 399.65 MHz  
OBSF 124.00 KHz  
OBSF 10500.0 Hz  
POINT 32768  
FREQ 7992.0 Hz  
SCANS 8  
ACQTM 4.100 sec  
PD 2.900 sec  
PWL 6.0 us  
IRNG 1H  
CTMP 22.5 C  
CLVP CDCL3  
SLVT 0.00 ppm  
EXRF 0.12 Hz  
RGAIN 20

C:\Documents and Settings\Administrator\fx\N/gfbv\N\ida\I51-2-1N0N\_E2\_FT.als  
I51-2

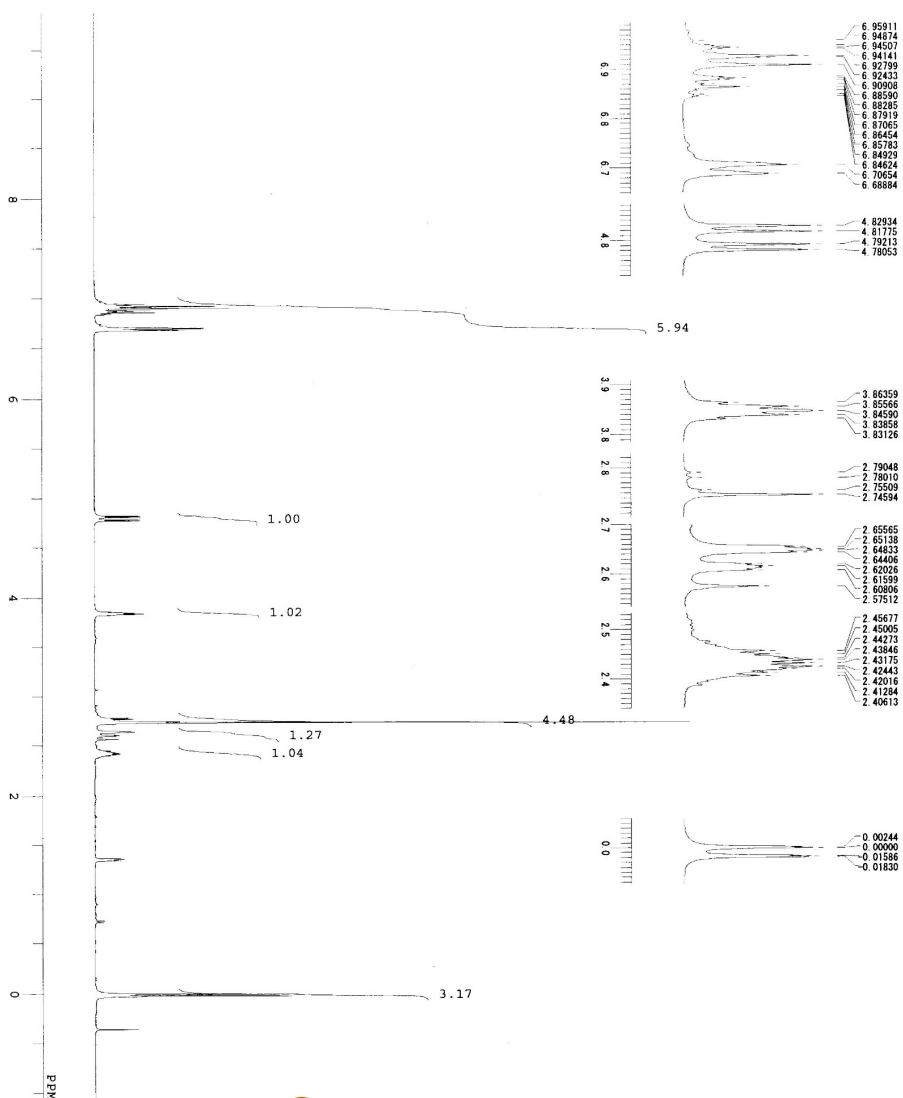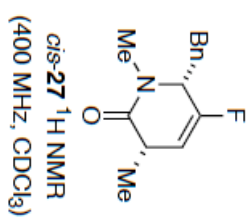

DPFILE C:\Documents and Settings\Admini  
 COMNT I51-2  
 DATIM Mon Dec 13 09:22:28 2004  
 OBNUC 1H  
 EXMOD NON  
 OBPRQ 399.65 MHz  
 OBSET 124.00 KHz  
 OBRIN 10500.0 Hz  
 POINT 32768  
 PREOU 7992.0 Hz  
 SCANS 8  
 ACQTM 4.100 sec  
 PD 2.900 sec  
 PUL 6.0 us  
 IRNUC 1H  
 CTMP 23.3 C  
 SLVNT CDCL3  
 EXREF 0.00 ppm  
 BF 0.12 Hz  
 RGAIN 18

C:\Documents and Settings\Administrator\fx\N/g/b/v\N\ida\111-1-1NON\_E9\_FT.als  
111-1

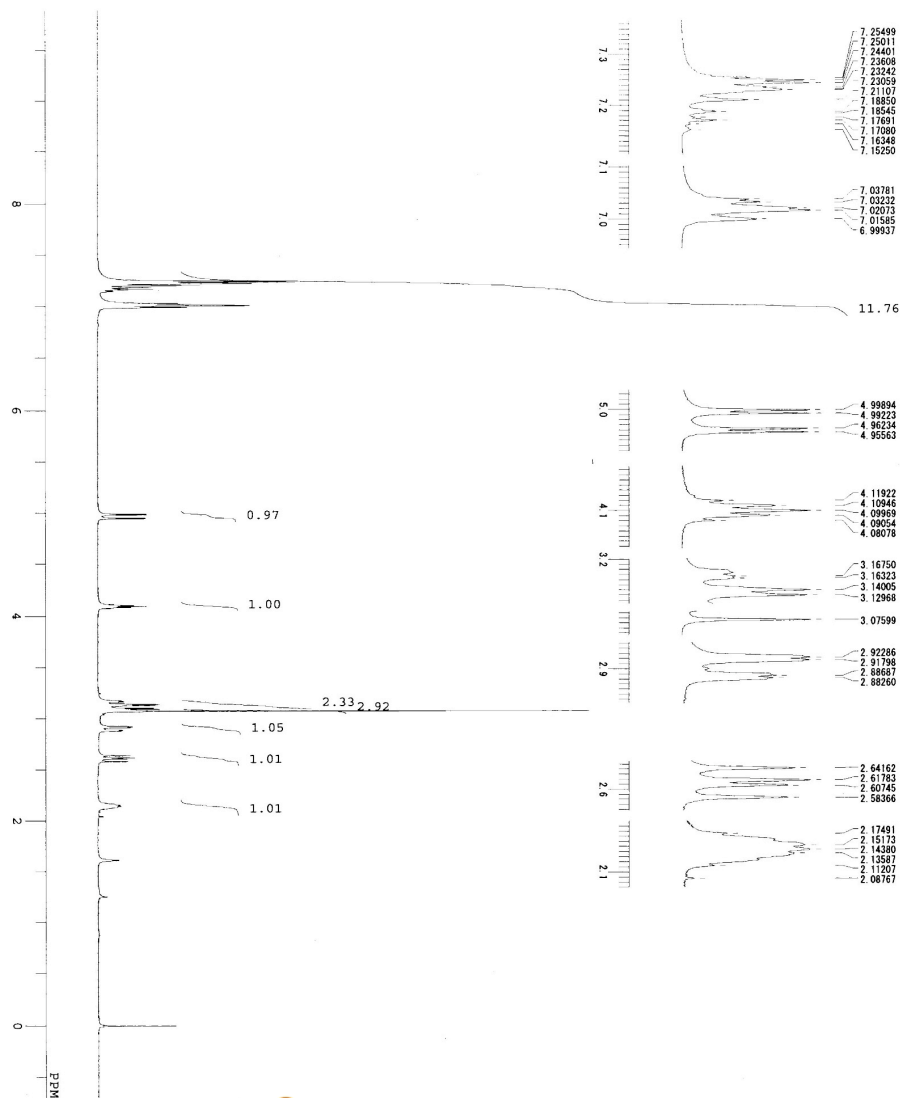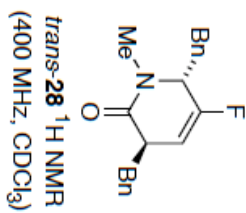

DFILE C:\Documents and Settings\Admini  
COUNT 111-1  
DATE Fri Nov 05 13:42:25 2004  
DATUM 111-1  
OBSOUC 1H  
EXMOD NON  
OBSOUC 399.65 MHz  
OBSOUC 124.00 KHz  
OBSOUC 10500.0 Hz  
POINT 32768  
FREQ 7992.0 Hz  
SCANS 8  
ACQTM 4.100 sec  
PD 2.900 sec  
PWL 6.0 us  
IRNUC 1H  
CTEMP 22.8 C  
SOLVENT CDCL3  
STVNT 0.00 ppm  
EXREF 0.12 Hz  
RGAIN 18

C:\Documents and Settings\Administrator\I\X\N/g/b/v\Nida\R\44.als  
R44

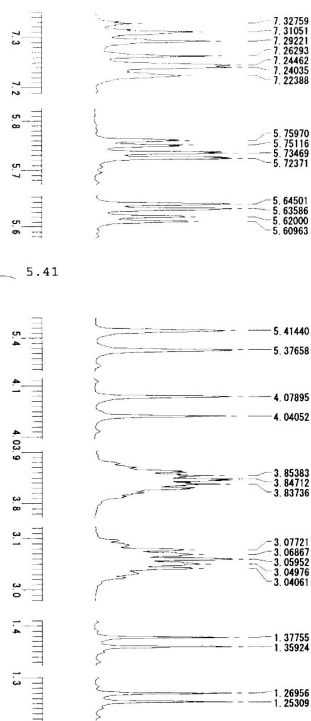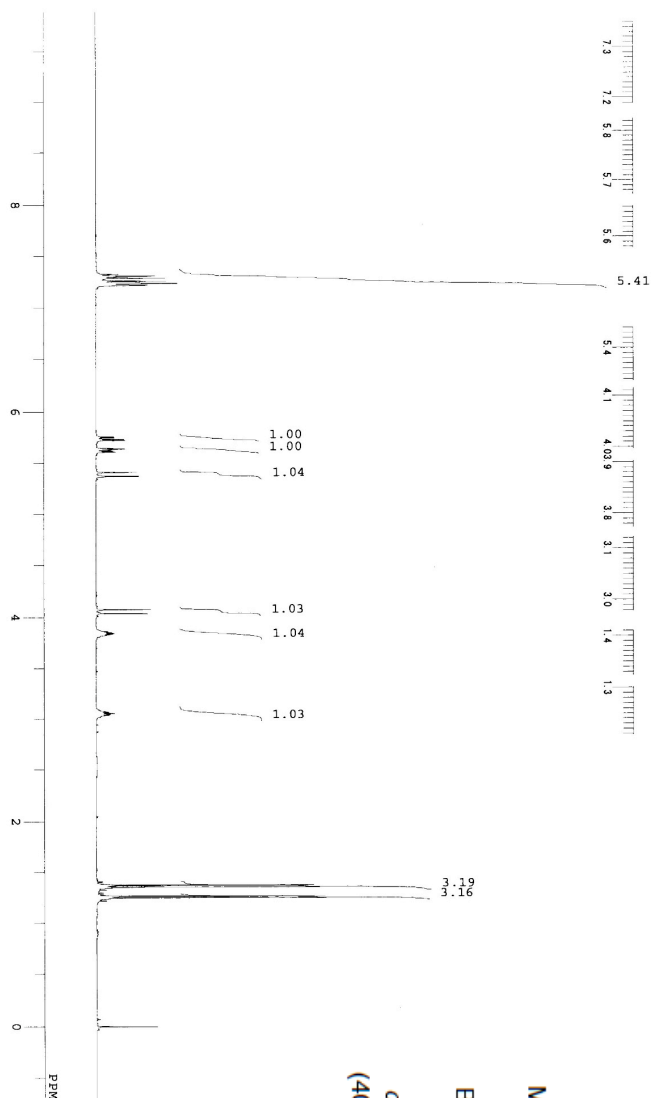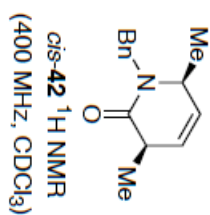

DRIF C:\Documents and Settings\Admini  
COMPT R44  
DATUM SAC Nov 13 13:41:23 2005  
ORNTC 1H  
EXMOD NON  
OBSRO 399.65 MHz  
OBSPT 124.00 KHz  
OBSIN 10500.0 Hz  
POINT 13768  
PRQU 7992.0 Hz  
SCANS 16  
ACQTM 4.100 sec  
PD 2.900 sec  
PWI 6.0 us  
IRNUC 1H  
CTEMP 23.0 C  
SLVNT CDCl<sub>3</sub>  
EXREF 0.00 ppm  
BF 0.12 Hz  
RGAIN 16

7. 39226  
7. 36969  
7. 36298  
7. 35566  
7. 34223  
7. 33003  
7. 31783  
7. 31295  
7. 29404  
7. 26232  
7. 24889  
7. 24218  
7. 22388  
7. 20619

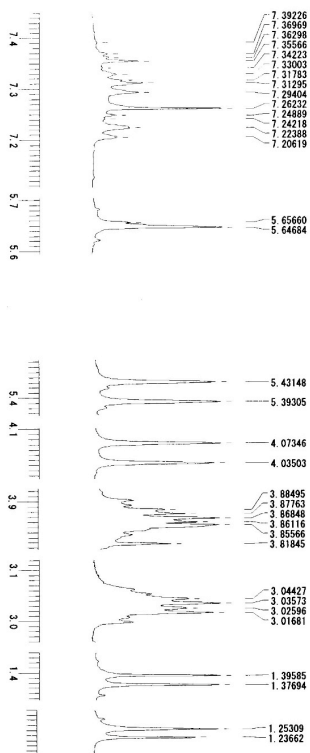

```

C:\Documents and Settings\Admini
COMTE
DWRITE
Font
R54-1
DARIC
Wed Jan 18 11:20:58 2006
OBNUC
EXMAD
NON
OBFRQ
399.65 MHz
OBSEF
12.00 KHz
OBFIN
10500.0 Hz
POINT
323768
FRECU
7992.0 Hz
SCANS
128
ACQTM
4.100 sec
PD
2.900 sec
PM1
5.5 us
CRNQC
1H
CTEMP
17.8 C
SLVNT
CDCL3
EXREF
0.00 ppm
BF
0.12 Hz
GC0AIN
19

```

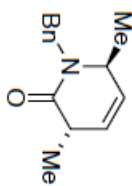

*trans*-**42** <sup>1</sup>H NMR  
(400 MHz, CDCl<sub>3</sub>)

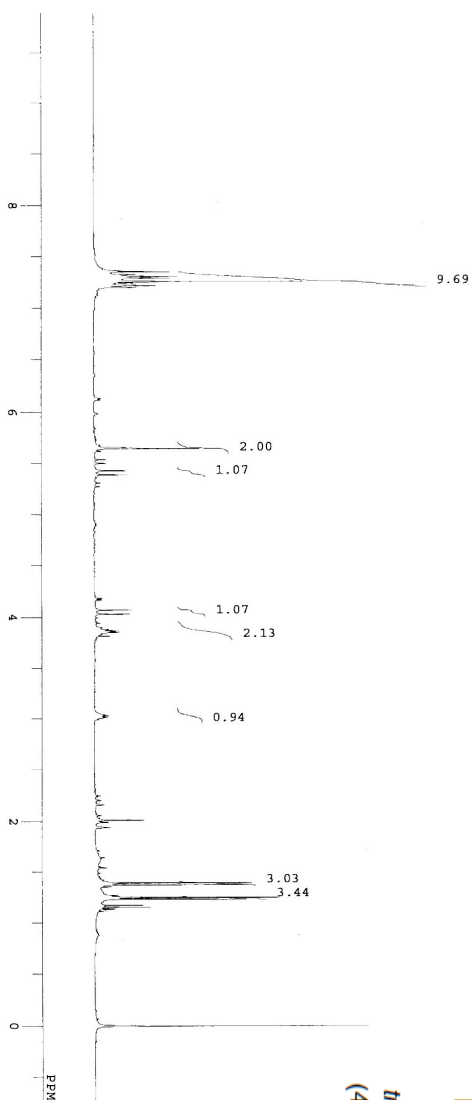



7. 32820  
7. 32454  
7. 30685  
7. 28916  
7. 26415  
7. 25865  
7. 24340  
7. 22327  
7. 20619

☐ 5. 74811  
☐ 5. 73408  
☐ 5. 73164  
☐ 5. 72310  
☐ 5. 72127

5. 64318  
5. 63281  
5. 61756  
5. 60780

5.42294  
5.41318  
5.38512  
5.37475

4.07590  
4.03808

3. 87275  
3. 86482  
3. 85688  
3. 84956  
3. 84224  
3. 84041  
3. 83614  
3. 83309  
3. 82577  
3. 81662

3. 07294  
3. 06501  
3. 05586  
3. 04671  
3. 03756  
3. 02902  
3. 01925  
3. 01071

1. 40195  
1. 39463  
1. 37450  
1. 35558  
1. 32935  
1. 29336  
1. 26590  
1. 24882  
1. 23967  
1. 22991  
1. 22320  
1. 21039  
1. 20551

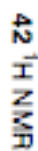

**trans : cis = 17 : 83**  
**(400 MHz, CDCl<sub>3</sub>)**

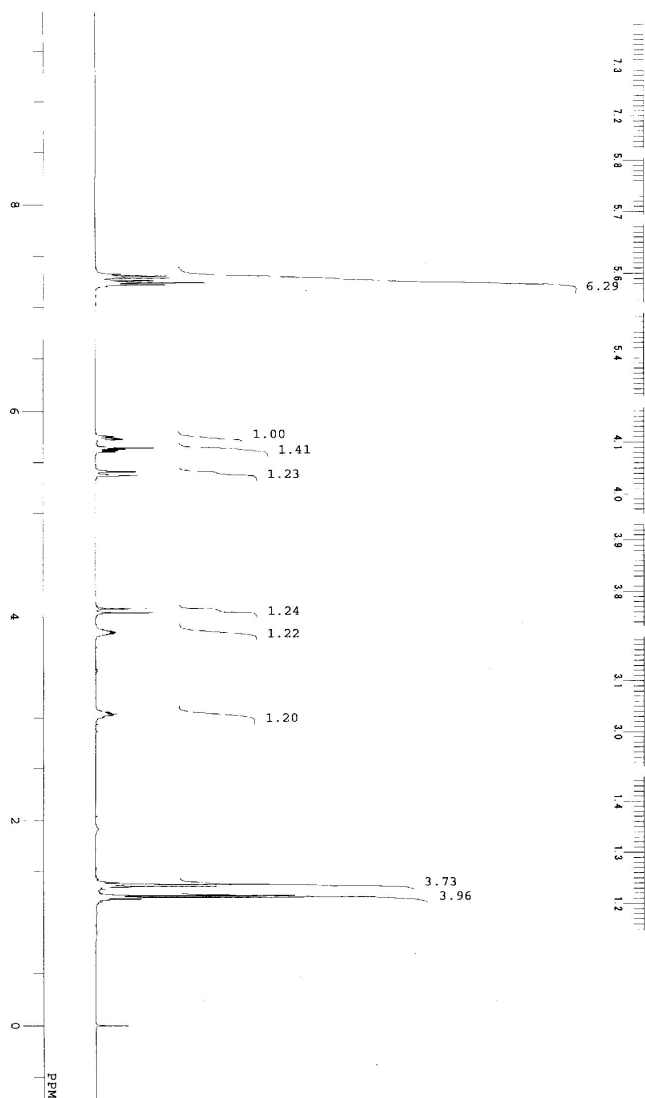

Supplement: Supplementary file 1 [file 5054440]
